# Supplementary material for: Cd stress alleviation in mung-bean seedlings with biogenic hydroxyapatite nanoparticles as ecofriendly remediation agents
Source: Royal Society of Chemistry journal article supplement (doi:10.1039/d2en00536k), 2022-01-01
Supplement: d2en00536k1.pdf [file d2en00536k1.pdf]

## Cd stress alleviation in mung-bean seedlings with biogenic hydroxyapatite nanoparticles as ecofriendly remediation agents

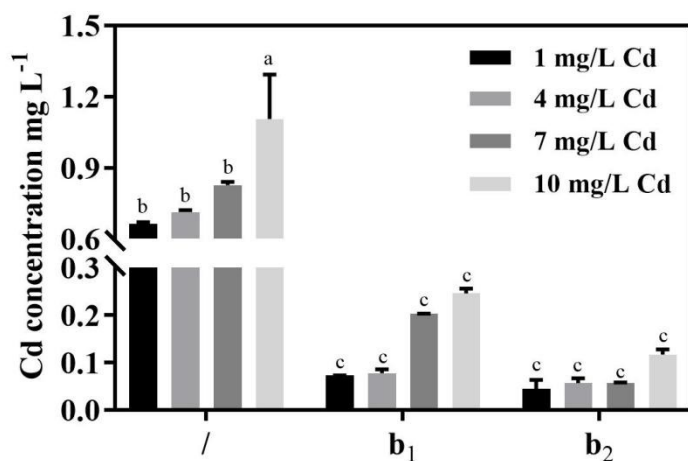

Fig. S1 Cd concentration in mung-bean seedling culture solution after 14-d of hydroponic growth

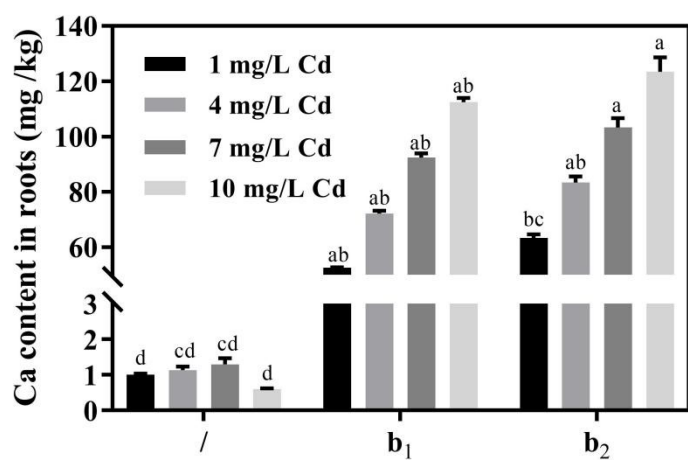

Fig. S2 Ca content in roots after 14-d hydroponics

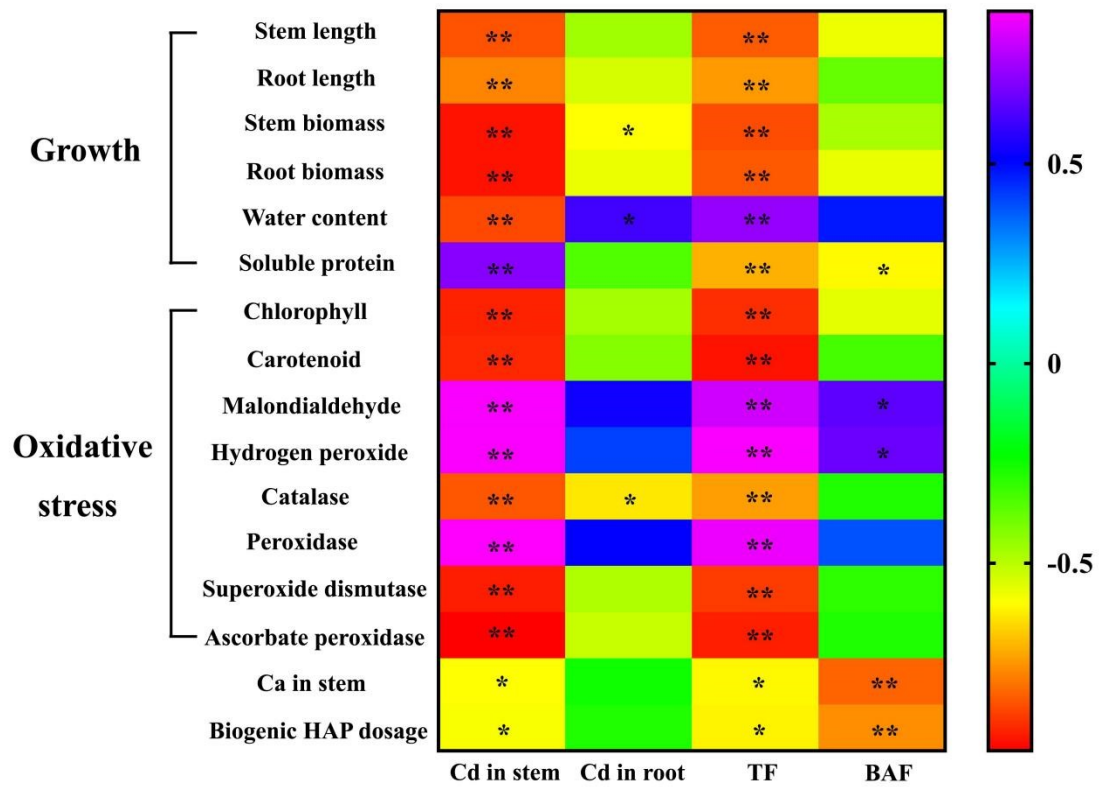

**Fig. S3** Pearson-correlation analysis of the relationships among plant development, antioxidant systems, and Cd contents under the biogenic hydroxyapatite nanoparticle treatments

**Table S1**

Experimental design for different treatment conditions

| Treatments        | Cd concentration (mg/L) | Biogenic HAP dosage |           |
|-------------------|-------------------------|---------------------|-----------|
|                   |                         | 0.25 mg/mL          | 0.5 mg/mL |
| CK                | 0                       | /                   | /         |
| 1 mg/L Cd         |                         | /                   | /         |
| 1+b <sub>1</sub>  | 1                       | √                   | /         |
| 1+b <sub>2</sub>  |                         | /                   | √         |
| 4 mg/L Cd         |                         | /                   | /         |
| 4+b <sub>1</sub>  | 4                       | √                   | /         |
| 4+b <sub>2</sub>  |                         | /                   | √         |
| 7 mg/L Cd         |                         | /                   | /         |
| 7+b <sub>1</sub>  | 7                       | √                   | /         |
| 7+b <sub>2</sub>  |                         | /                   | √         |
| 10 mg/L Cd        |                         | /                   | /         |
| 10+b <sub>1</sub> | 10                      | √                   | /         |
| 10+b <sub>2</sub> |                         | /                   | √         |

**Table S2**Effects of different treatments on photosynthetic pigments. Chl *a*: chlorophyll *a*; Chl *b*: chlorophyll *b*; Total chl: total chlorophyll; Car: total carotenoids.

| Treatments                 | Chl <i>a</i>              | Chl <i>b</i>             | Total chl                 | Chl <i>a</i> / chl <i>b</i> | Total car                | Car/ total chl            |
|----------------------------|---------------------------|--------------------------|---------------------------|-----------------------------|--------------------------|---------------------------|
| CK                         | 23.34±0.919 <sup>a</sup>  | 8.18±0.255 <sup>bc</sup> | 31.52±1.174 <sup>ab</sup> | 2.85±0.024 <sup>b</sup>     | 6.22±0.071 <sup>a</sup>  | 0.20±0.005 <sup>abc</sup> |
| 1 mg/L Cd                  | 17.51±0.919 <sup>bc</sup> | 5.71±0.156 <sup>e</sup>  | 23.22±0.919 <sup>cd</sup> | 3.07±0.050 <sup>ab</sup>    | 4.22±0.297 <sup>de</sup> | 0.18±0.006 <sup>bcd</sup> |
| 4 mg/L Cd                  | 14.47±1.103 <sup>cd</sup> | 4.70±0.156 <sup>f</sup>  | 19.17±1.386 <sup>de</sup> | 3.08±0.011 <sup>ab</sup>    | 3.46±0.339 <sup>ef</sup> | 0.18±0.005 <sup>bcd</sup> |
| 7 mg/L Cd                  | 11.52±0.891 <sup>d</sup>  | 3.30±0.184 <sup>g</sup>  | 14.82±1.082 <sup>e</sup>  | 3.49±0.214 <sup>a</sup>     | 3.38±0.113 <sup>f</sup>  | 0.23±0.009 <sup>ab</sup>  |
| 10 mg/L Cd                 | 3.71±0.735 <sup>e</sup>   | 1.24±0.057 <sup>h</sup>  | 4.95±0.114 <sup>f</sup>   | 2.99±0.020 <sup>ab</sup>    | 1.14±0.071 <sup>g</sup>  | 0.23±0.037 <sup>a</sup>   |
| 1 mg/L Cd +b <sub>1</sub>  | 24.23±0.198 <sup>a</sup>  | 8.67±0.283 <sup>b</sup>  | 32.90±2.234 <sup>a</sup>  | 2.80±0.382 <sup>b</sup>     | 5.19±0.057 <sup>b</sup>  | 0.16±0.018 <sup>cde</sup> |
| 1 mg/L Cd +b <sub>2</sub>  | 25.60±0.891 <sup>a</sup>  | 9.49±0.170 <sup>a</sup>  | 33.84±0.948 <sup>a</sup>  | 2.70±0.163 <sup>ab</sup>    | 5.63±0.339 <sup>ab</sup> | 0.16±0.015 <sup>cde</sup> |
| 4 mg/L Cd +b <sub>1</sub>  | 23.28±1.018 <sup>a</sup>  | 8.41±0.283 <sup>bc</sup> | 31.69±0.735 <sup>ab</sup> | 2.77±0.046 <sup>b</sup>     | 5.21±0.283 <sup>b</sup>  | 0.16±0.009 <sup>cde</sup> |
| 4 mg/L Cd +b <sub>2</sub>  | 25.04±1.499 <sup>a</sup>  | 8.80±0.170 <sup>ab</sup> | 33.84±1.640 <sup>a</sup>  | 2.85±0.128 <sup>b</sup>     | 5.05±0.057 <sup>bc</sup> | 0.15±0.009 <sup>cde</sup> |
| 7 mg/L Cd +b <sub>1</sub>  | 20.36±0.679 <sup>ab</sup> | 7.09±0.424 <sup>d</sup>  | 27.45±0.611 <sup>bc</sup> | 2.81±0.125 <sup>ab</sup>    | 4.28±0.127 <sup>cd</sup> | 0.16±0.011 <sup>cde</sup> |
| 7 mg/L Cd +b <sub>2</sub>  | 23.17±1.188 <sup>a</sup>  | 7.85±0.297 <sup>c</sup>  | 31.02±1.112 <sup>ab</sup> | 2.95±0.174 <sup>ab</sup>    | 4.23±0.170 <sup>de</sup> | 0.14±0.006 <sup>de</sup>  |
| 10 mg/L Cd +b <sub>1</sub> | 20.03±0.071 <sup>ab</sup> | 7.08±0.113 <sup>d</sup>  | 27.11±1.485 <sup>bc</sup> | 2.83±0.068 <sup>ab</sup>    | 3.44±0.226 <sup>ef</sup> | 0.13±0.013 <sup>e</sup>   |
| 10 mg/L Cd +b <sub>2</sub> | 21.77±1.372 <sup>ab</sup> | 8.21±0.170 <sup>bc</sup> | 29.98±2.464 <sup>ab</sup> | 2.65±0.123 <sup>b</sup>     | 4.23±0.198 <sup>de</sup> | 0.14±0.005 <sup>de</sup>  |
